# Supplementary material
Source: publisher figshare collection journal article supplement (https://acs.figshare.com/ndownloader/files/4547845)
Supplement: Supplementary file 1 [file 4547845]

## **Supporting Information For:**

### **Diurnal and Seasonal Variability of Gasoline-Related Volatile Organic Compounds in Riverside, California**

Drew R. Gentner,<sup>§, ‡</sup> Robert A. Harley,<sup>\*, §</sup> Angela M. Miller,<sup>‡, Δ</sup> and Allen H. Goldstein<sup>‡, §</sup>

<sup>§</sup> Department of Civil and Environmental Engineering, University of California, Berkeley, CA 94720

<sup>‡</sup> Division of Ecosystem Sciences, Department of Environmental Science, Policy, and Management, University of California, Berkeley, CA 94720

<sup>Δ</sup> Department of Chemistry, University of California, Berkeley, CA 94720

\*Corresponding author email: harley@ce.berkeley.edu; phone: (510) 643-9168.

## **Summary of Supporting Information:**

6 Pages (excluding cover): S1-S6

### **Tables**

- S1. Compounds Measured During SOAR 2005
- S2. Percent Vapor Contribution to Gasoline-related VOC Emissions
- S3. VOC/CO Ratios

### **Figures**

- S1. Sample Chromatograms for SOAR Measurements
- S2. Weekly Diurnal Ozone and Ambient Temperature Profiles
- S3. Diurnal EMFAC-derived Evaporative Emissions During Summer 2005
- S4. Daytime Vapor Contribution Fraction from Weekday Summer Measurements Compared to EMFAC Model Results
- S5. Gasoline-related VOC to CO Ratios for Weekday and Weekend Including EMFAC Results

**Table S1: Compounds Measured During SOAR 2005**

|                           |                         |                   |
|---------------------------|-------------------------|-------------------|
| 2-pentanone               | isoprene                | pentane           |
| 3-pentanone               | isopropanol             | propanal          |
| acetone                   | methacrolein            | propane           |
| acetonitrile              | methyl ethyl ketone     | propene           |
| alpha-pinene              | methyl furan            | propyne           |
| benzene                   | methyl nitrate          | toluene           |
| beta-pinene               | methyl tert-butyl ether | trans-2-butene    |
| butanal                   | methyl vinyl ketone     | water vapor       |
| butane                    | methyl-1-butene         | C2Cl4             |
| butene                    | methyl2butanone         | C2HCl3            |
| carbon monoxide           | methylbutenol           | CCl3F             |
| cyclopentane              | methylpentane           | CH2Cl2            |
| dimethylsulfide           | methylpropanal          | CH3CCl3           |
| ethyl & isopropyl nitrate | methylpropene           | CH3Cl             |
| heptane                   | neopentane              | CH3I              |
| hexanal                   | n-propyl nitrate        | CHCl3             |
| hexane                    | o-xylene                | CHClF2            |
| isobutane                 | ozone                   | Cl2FC-CClF2       |
| isopentane                | pentanal                | F141b (Cl2FC-CH3) |

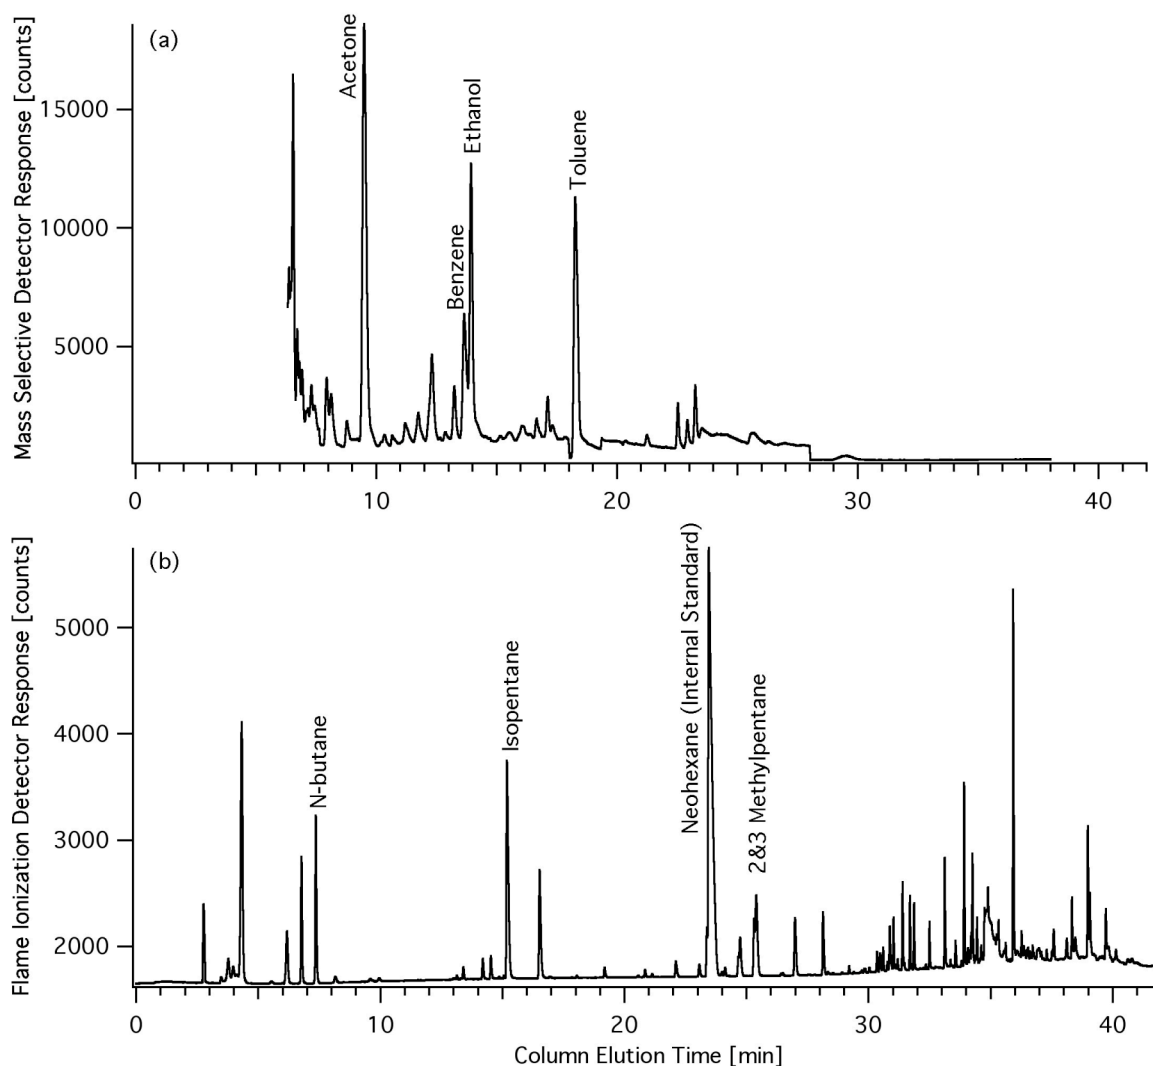

Figure S1: Sample chromatograms from Summer SOAR measurements (07:00 7/26/2005) for (a) the mass selective detector and (b) the flame ionization detector

#### Notes on EMFAC Model Calculations:

The model (EMFAC 2007 v2.3) was run for the summer season constrained to the portion of Riverside County in the South Coast air basin using model years 1965-2005 and all classes of gasoline-powered vehicles in the enhanced interim method (8). To calculate the percent vapor contribution, vapor and whole gasoline emissions are grouped as defined in the introduction; with the exception that running losses were halved between whole gasoline and fuel vapor emissions to account for liquid fuel spills, which is in accordance with previous work (4).

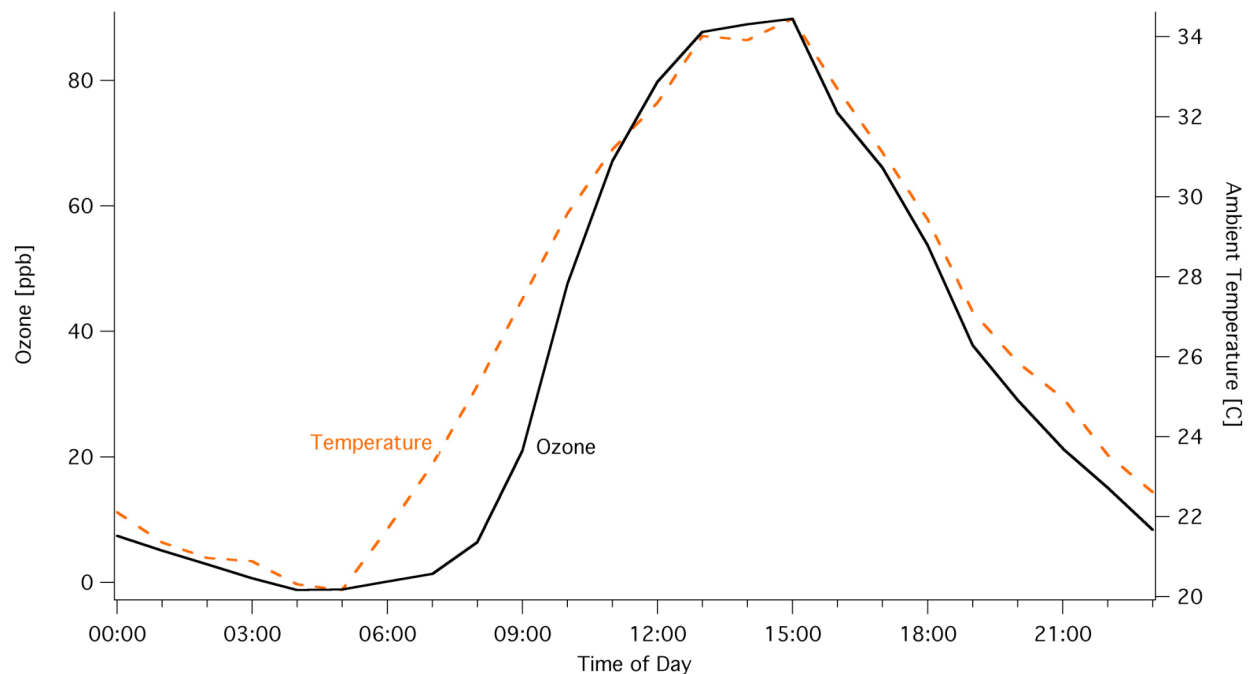

Figure S2: Superimposed weekday diurnal ozone and ambient temperature profiles

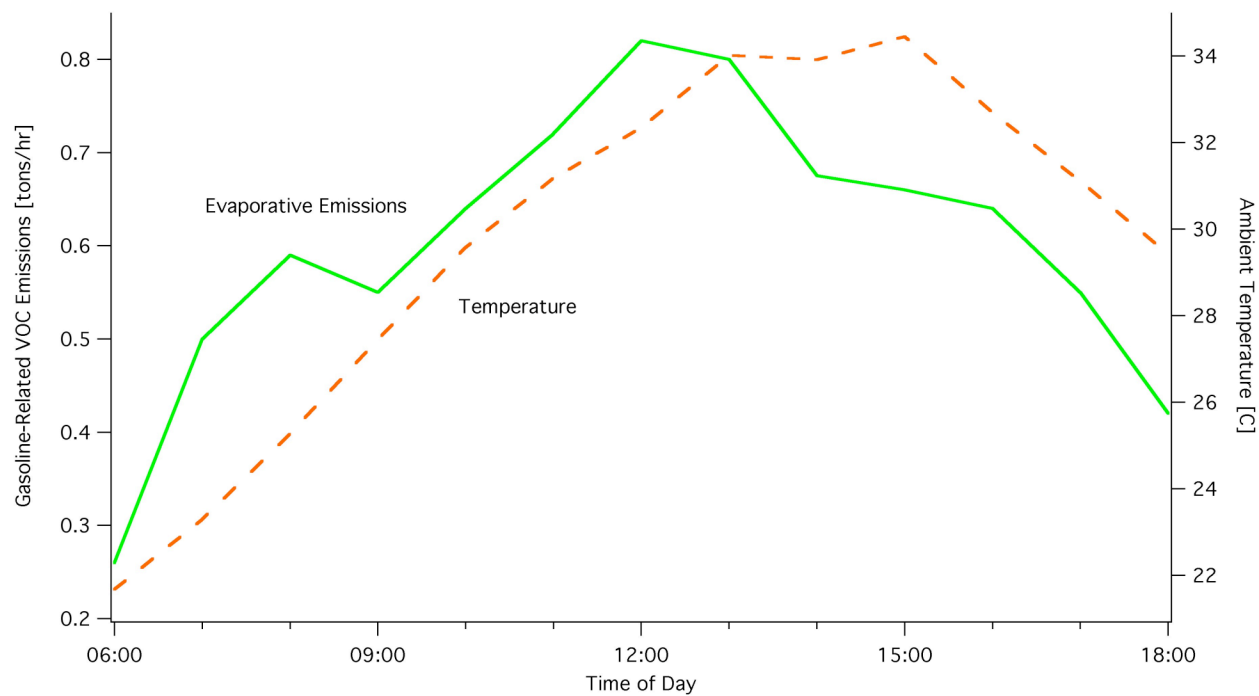

Figure S3: Diurnal EMFAC-derived evaporative emissions during summer 2005 with ambient temperature observations superimposed

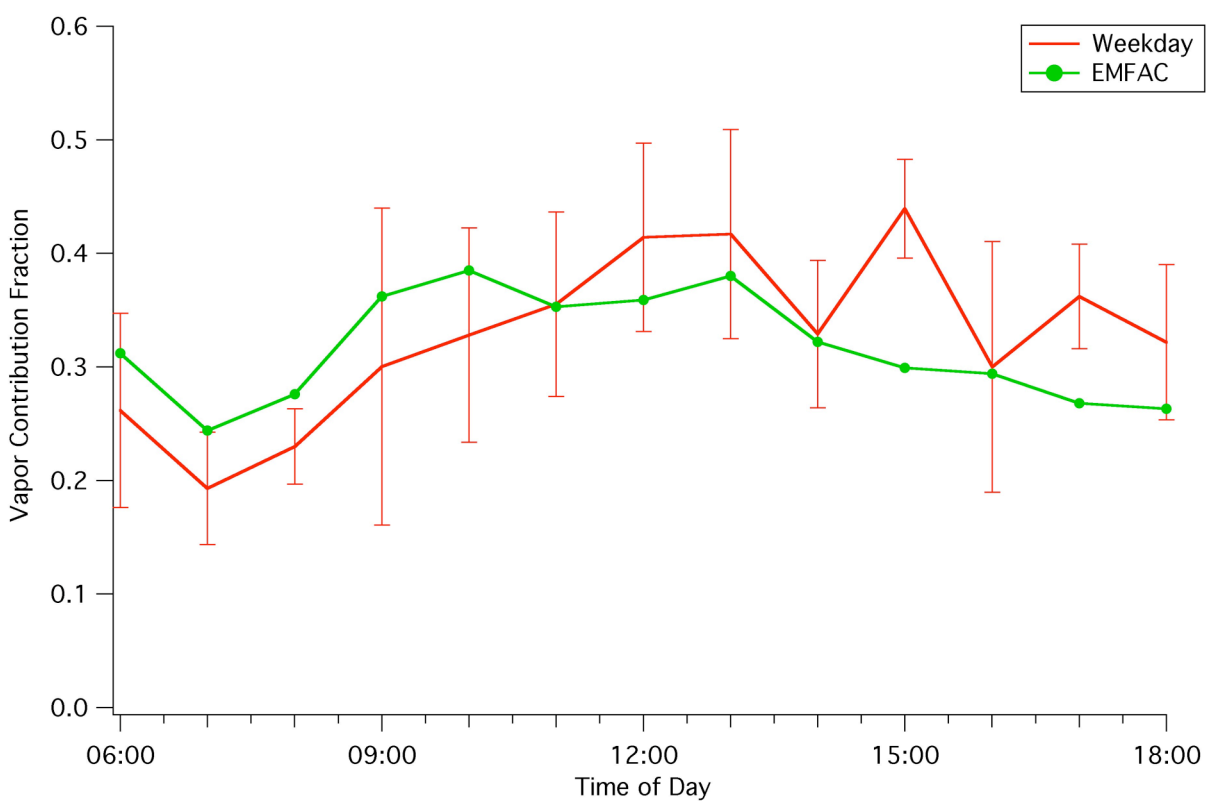

Figure S4: Daytime vapor contribution fraction from weekday summer measurements (with 95% confidence intervals) compared to EMFAC model results

**Table S2: Percent Vapor Contribution to Gasoline-related VOC Emissions ( $\pm$  95% Confidence Intervals)**

| <b>Hour</b> | <b>Weekday</b> | <b>Weekend</b> | <b>EMFAC</b> |
|-------------|----------------|----------------|--------------|
| 0:00:00     | 31 $\pm$ 13    | 23 $\pm$ 1     | 41           |
| 1:00:00     | 30 $\pm$ 5     | 27 $\pm$ 7     | 58           |
| 2:00:00     | 34 $\pm$ 19    | 32 $\pm$ 13    | 59           |
| 3:00:00     | 38 $\pm$ 23    | 29 $\pm$ 6     | 75           |
| 4:00:00     | 26 $\pm$ 2     | 29 $\pm$ 5     | 53           |
| 5:00:00     | 21 $\pm$ 4     | 24 $\pm$ 3     | 47           |
| 6:00:00     | 26 $\pm$ 9     | 22 $\pm$ 6     | 31           |
| 7:00:00     | 19 $\pm$ 5     | 22 $\pm$ 5     | 24           |
| 8:00:00     | 23 $\pm$ 3     | 23 $\pm$ 11    | 28           |
| 9:00:00     | 30 $\pm$ 14    | 37 $\pm$ 8     | 36           |
| 10:00:00    | 33 $\pm$ 9     | 33 $\pm$ 9     | 39           |
| 11:00:00    | 36 $\pm$ 8     | 46 $\pm$ 10    | 35           |
| 12:00:00    | 41 $\pm$ 8     | 49 $\pm$ 22    | 36           |
| 13:00:00    | 42 $\pm$ 9     | 34 $\pm$ 13    | 38           |
| 14:00:00    | 33 $\pm$ 6     | 31 $\pm$ 12    | 32           |
| 15:00:00    | 44 $\pm$ 4     | 47 $\pm$ 11    | 30           |
| 16:00:00    | 30 $\pm$ 11    | 52 $\pm$ 13    | 29           |
| 17:00:00    | 36 $\pm$ 5     | 37 $\pm$ 6     | 27           |
| 18:00:00    | 32 $\pm$ 7     | 39 $\pm$ 11    | 26           |
| 19:00:00    | 29 $\pm$ 6     | 42 $\pm$ 9     | 26           |
| 20:00:00    | 27 $\pm$ 8     | 28 $\pm$ 6     | 26           |
| 21:00:00    | 34 $\pm$ 13    | 27 $\pm$ 9     | 28           |
| 22:00:00    | 33 $\pm$ 10    | 32 $\pm$ 14    | 23           |
| 23:00:00    | 23 $\pm$ 8     | 32 $\pm$ 16    | 29           |

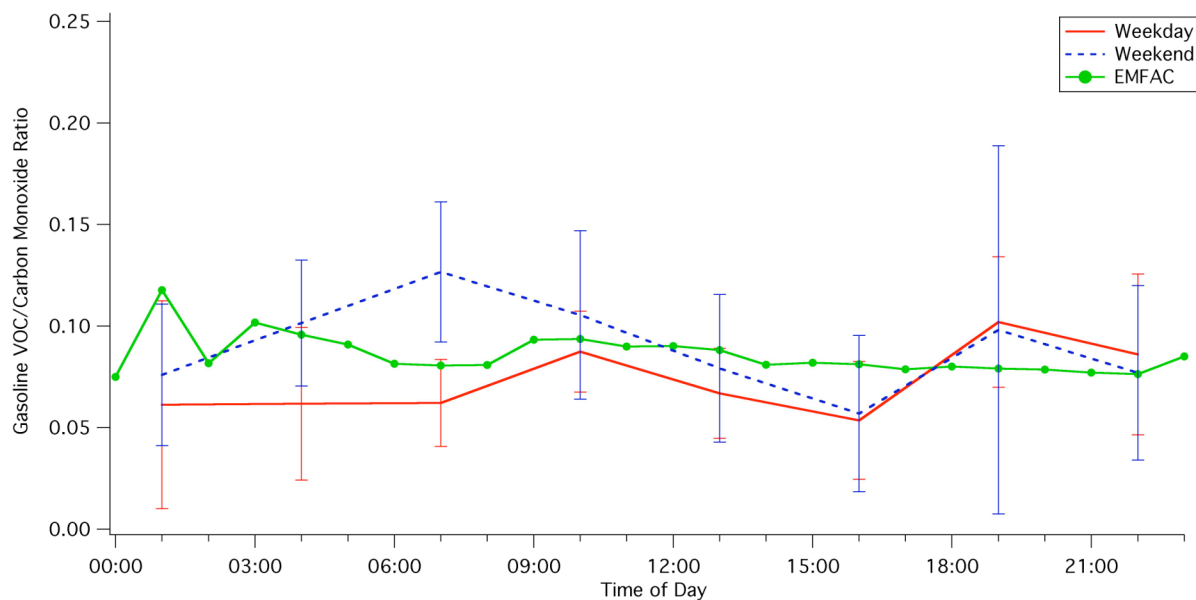

Figure S5: Gasoline-related VOC to CO ratios for weekday and weekend (with 95% confidence intervals) including EMFAC model results

**Table S3: VOC/CO Ratios ( $\pm$  95% Confidence Intervals)**

| Time of Day | Weekday           | Weekend           | EMFAC |
|-------------|-------------------|-------------------|-------|
| 0:00-3:00   | 0.061 $\pm$ 0.051 | 0.076 $\pm$ 0.035 | 0.091 |
| 3:00-6:00   | 0.062 $\pm$ 0.038 | 0.101 $\pm$ 0.031 | 0.096 |
| 6:00-9:00   | 0.062 $\pm$ 0.021 | 0.127 $\pm$ 0.035 | 0.081 |
| 9:00-12:00  | 0.087 $\pm$ 0.020 | 0.106 $\pm$ 0.041 | 0.092 |
| 12:00-15:00 | 0.067 $\pm$ 0.022 | 0.079 $\pm$ 0.036 | 0.086 |
| 15:00-18:00 | 0.054 $\pm$ 0.029 | 0.057 $\pm$ 0.038 | 0.081 |
| 18:00-21:00 | 0.102 $\pm$ 0.032 | 0.098 $\pm$ 0.091 | 0.079 |
| 21:00-0:00  | 0.086 $\pm$ 0.040 | 0.077 $\pm$ 0.043 | 0.079 |
